# Supplementary material
Source: publisher figshare collection journal article supplement (https://acs.figshare.com/ndownloader/files/22167069)
Supplement: Supplementary file 1 [file 22167069]

## Supplementary Information

### **Influence of Setback Distance on Antibiotics and Antibiotic Resistance Genes in Runoff and Soil Following the Land Application of Swine Manure Slurry**

Maria C. Hall,<sup>†</sup> Noelle A. Mware,<sup>†</sup> John E. Gilley,<sup>§</sup> Shannon L. Bartelt-Hunt,<sup>†</sup> Daniel D. Snow,<sup>‡</sup>  
Amy M. Schmidt,<sup>||</sup> Kent M. Eskridge,<sup>⊥</sup> and Xu Li<sup>\*†</sup>

<sup>†</sup>Department of Civil and Environmental Engineering, University of Nebraska-Lincoln, Lincoln, Nebraska 68588, United States

<sup>§</sup>USDA-ARS, Lincoln, Nebraska 68583, United States

<sup>‡</sup>School of Natural Resources, Water Sciences Laboratory, University of Nebraska-Lincoln, Lincoln, Nebraska 68583, United States

<sup>||</sup>Department of Biological Systems Engineering, University of Nebraska-Lincoln, Lincoln, Nebraska 68583, United States

<sup>⊥</sup>Department of Statistics, University of Nebraska-Lincoln, Lincoln, Nebraska 68583, United States

\* Corresponding Author:  
900 N 16th St., W150D Nebraska Hall  
Lincoln, NE 68588-0531  
Email: [xuli@unl.edu](mailto:xuli@unl.edu)

Page: 11

Figure: 2

Table: 6

## MATERIALS AND METHODS

**ARG Analysis.** Synthesized gBlocks gene fragments (Integrated DNA Technologies) were used as qPCR standards. The qPCR reactions were performed on an Eppendorf Mastercycler ep realplex 2 thermocycler (Hamburg, Germany) using KiCqStart® SYBR® Green qPCR ReadyMix™ and KiCqStart® Probe qPCR ReadyMix™ (Sigma-Aldrich, St. Louis, MO). Assay setup and cycling conditions were adopted from previously reported studies (Tables S1 and S2). Linear ranges and reaction efficiencies are reported in Table S3. Samples were considered below detection limit (BDL), if the results from at least two of the four replicate plots were below the detection limit and the results from the remaining plots were close to the detection limit.

**Antibiotic Analyses.** Swine slurry and soil were both processed as solid samples during antibiotic extraction. Prior to extraction, swine slurry was mixed with 0.5 g EDTA and clean sand in a 1:25 ratio by weight. Homogenized soil (10 g) and swine slurry/sand samples (5.2 g) were spiked with 100 ng surrogate oleandomycin and mixed with an aqueous buffer (14 mL of 100 mM ammonium citrate plus 4.0 g/L ammonia acetate adjusted with ammonium hydroxide to pH 6) along with 6 mL of acetonitrile. The mixtures were thoroughly shaken on a Burrell wrist-action shaker for 30 min and centrifuged for 10 min. The solids were extracted a second time using 4 mL aqueous buffer and 16 mL acetonitrile. The supernatants from the two extraction steps were combined and then concentrated on a Labconco RapidVap N<sub>2</sub> sample concentrator (Labconco Corporation, Kansas City, MO) at 30°C until the volume was reduced by approximately half. Purified reagent water was then added to bring the final volume to 100 mL prior to solid phase extraction.

Water samples were measured into 100 mL aliquots, spiked with oleandomycin surrogate and vacuum filtered through pre-combusted 0.5 µm Gellman A/E binderless glass fiber filters in tandem with 200 mg Oasis HLB (Waters Corporation, Milford, MA) solid phase extraction (SPE) cartridges preconditioned with 5 mL acetonitrile followed by 5 mL high purity (ASTM Type I) reagent water. Aqueous soil and slurry extracts were extracted using the same cartridges. The SPE cartridges were eluted into borosilicate test tubes using 6 mL mixture of 1% 100 mM ammonium acetate (pH=4.0) plus 99% acetonitrile. The eluent was evaporated to dryness and concentrated extracts were reconstituted with 200 µL of mobile phase containing 100 ng doxycycline, penicillin V, and roxithromycin as internal standards. The 200 µL eluent samples were combined with 250 µL of mobile phase and then analyzed on an Agilent 1100 high pressure liquid chromatograph (HPLC) coupled with an Agilent 6410 triple quadrupole mass spectrophotometer (Agilent Technologies, Palo Alto, CA) using positive electrospray ionization.

Separation was performed on a 250 mm × 2.1 mm ID, 5 µm particle size HyPURITY™ C18 column (ThermoFisher, St. Louis, MO) at a temperature of 50°C and a gradient flow rate of 0.20 mL/min. Mobile phase solvents were: A) 1 mM ammonium citrate (pH=4) in 97% methanol / 3% water, and B) 1 mM ammonium citrate (pH=4) in water. Gradient details were: initial conditions at 0% A for 1.0 min, linear gradient to reach 75% A at 4 min and 100% A at 12 min, and 100% A until 22 min. The column was flushed with 2% formic acid in methanol for 3 min and then back to initial conditions (0% A) for 7 min. Total run time is 32 minutes.

Multi-reaction monitoring, using a pseudo-molecular ion [M+H]<sup>+</sup> selected as the parent ion for fragmentation and corresponding fragment ion(s), were used for identification and quantitation. Ionization and collision energies are optimized based on procedures described by the instrument manufacturer. Desolvation gas was nitrogen (N<sub>2</sub>) at 12 L/min, sheath gas temperature was 350°C, nebulizer held at 40 psi, capillary voltage was 4 kV and cell accelerator voltage at 7 kV. Fragmentor and collision energies used for each standard and analyte are given in Table S4.

81 Table S1. Primers and probes used in qPCR assays

| Target gene               | Primer                        | Sequence (5'-3')                  | Target size (bp) | Annealing temperature (°C) | Reference |
|---------------------------|-------------------------------|-----------------------------------|------------------|----------------------------|-----------|
| 16s rRNA                  | BACT1369F                     | CGG TGA ATA CGT TCY CGG           | 142              | 56                         | 1         |
|                           | PROK1492R                     | GGW TAC CTT GTT ACG ACT T         |                  |                            |           |
| <i>bla</i> <sub>TEM</sub> | <i>bla</i> <sub>TEM</sub> -FW | CAC TAT TCT CAG AAT GAC TTG GT    | 85               | 60                         | 2         |
|                           | <i>bla</i> <sub>TEM</sub> -RV | TGC ATA ATT CTC TTA CTG TCA TG    |                  |                            |           |
|                           | Probe                         | CCA GTC ACA GAA AAG CAT CTT ACG G |                  |                            |           |
| <i>erm</i> (B)            | <i>erm</i> (B)-FW             | GGT TGC TCT TGC ACA CTC AAG       | 191              | 65                         | 3         |
|                           | <i>erm</i> (B)-RV             | CAG TTG ACG ATA TTC TCG ATT G     |                  |                            |           |
| <i>erm</i> (C)            | <i>erm</i> (C)-FW             | AAT CGT GGA ATA CGG GTT TGC       | 293              | 63                         | 3         |
|                           | <i>erm</i> (C)-RV             | CGT CAA TTC CTG CAT GTT TTA AGG   |                  |                            |           |
| <i>erm</i> (F)            | <i>erm</i> (F)-FW             | TCT GGG AGG TTC CAT TGT CC        | 412              | 65                         | 3         |
|                           | <i>erm</i> (F)-RV             | TTC AGG GAC AAC TTC CAG C         |                  |                            |           |
| <i>intI1</i>              | qINT-3                        | TGC CGT GAT CGA AAT CCA GAT CCT   | 109              | 60                         | 4         |
|                           | qINT-4                        | TTT CTG GAA GGC GAG CAT CGT TTG   |                  |                            |           |
| <i>tet</i> (D)            | <i>tet</i> (D)-FW             | GAA TGC CTG CAC CTT TCT GAT G     | 346              | 62                         | 5         |
|                           | <i>tet</i> (D)-RV             | GGC AAT AAA TCC GGC GAA AA        |                  |                            |           |
| <i>tet</i> (O)            | <i>tet</i> (O)-FW             | ACG GAR AGT TTA TTG TAT ACC       | 171              | 50.3                       | 6, 7*     |
|                           | <i>tet</i> (O)-RV             | TGG CGT ATC TAT AAT GTT GAC       |                  |                            |           |
| <i>tet</i> (Q)            | <i>tet</i> (Q)-FW             | AGA ATC TGC TGT TTG CCA GTG       | 167              | 63                         | 6         |
|                           | <i>tet</i> (Q)-RV             | CGG AGT GTC AAT GAT ATT GCA       |                  |                            |           |
| <i>tet</i> (X)            | <i>tet</i> (X)-FW             | AGC CTT ACC AAT GGG TGT AAA       | 278              | 60                         | 8         |
|                           | <i>tet</i> (X)-RV             | TTC TTA CCT TGG ACA TCC CG        |                  |                            |           |

\*Primer sequence from Aminov et al. 2009 and annealing temperature from Pei et al. 2006.

Table S2. Primers used in endpoint PCR assays (if different from qPCR primers)

| Target gene   | Primer            | Sequence (5'-3')            | Target size (bp) | Annealing temperature (°C) | Reference |
|---------------|-------------------|-----------------------------|------------------|----------------------------|-----------|
| 16S rRNA gene | 27F               | AGA GTT TGA TCM TGG CTC AG  | 1,484            | 55                         | 9         |
|               | 1492R             | GGW TAC CTT GTT ACG ACT T   |                  |                            |           |
| <i>tet(D)</i> | <i>tet(D)</i> -FW | AAA CCA TTA CGG CAT TCT GC  | 787              | 55                         | 10        |
|               | <i>tet(D)</i> -RV | GAC CGG ATA CAC CAT CCA TC  |                  |                            |           |
| <i>tet(O)</i> | <i>tet(O)</i> -FW | AAC TTA GGC ATT CTG GCT CAC | 515              | 55                         | 10        |
|               | <i>tet(O)</i> -RV | TCC CAC TGT TCC ATA TCG TCA |                  |                            |           |

87 Table S3. qPCR assay reaction conditions, linear ranges, and efficiencies

| Target gene               | Linear range<br>(gene copies/ $\mu$ L) | R <sup>2</sup> | Efficiency |
|---------------------------|----------------------------------------|----------------|------------|
| 16s rRNA                  | 10 <sup>2</sup> -10 <sup>8</sup>       | $\geq 0.998$   | 88%-94%    |
| <i>bla</i> <sub>TEM</sub> | 10 <sup>1</sup> -10 <sup>8</sup>       | $\geq 0.990$   | 82%-90%    |
| <i>erm</i> (B)            | 10 <sup>1</sup> -10 <sup>8</sup>       | $\geq 0.995$   | 85%-95%    |
| <i>erm</i> (C)            | 10 <sup>2</sup> -10 <sup>8</sup>       | $\geq 0.999$   | 86%-91%    |
| <i>erm</i> (F)            | 10 <sup>1</sup> -10 <sup>8</sup>       | $\geq 0.993$   | 84%-103%   |
| <i>int</i> I1             | 10 <sup>1</sup> -10 <sup>8</sup>       | $\geq 0.995$   | 84%-92%    |
| <i>tet</i> (D)            | 10 <sup>1</sup> -10 <sup>8</sup>       | $\geq 0.998$   | 80%-84%    |
| <i>tet</i> (O)            | 10 <sup>1</sup> -10 <sup>8</sup>       | $\geq 0.994$   | 97%-105%   |
| <i>tet</i> (Q)            | 10 <sup>1</sup> -10 <sup>8</sup>       | $\geq 0.997$   | 88%-101%   |
| <i>tet</i> (X)            | 10 <sup>2</sup> -10 <sup>8</sup>       | $\geq 0.997$   | 78%-88%    |

88

Table S4. Multiple reaction monitoring (MRM) transitions used and source conditions for analytes, internal standards (\*) and surrogate (\*\*) compounds.

| Compound          | Parent Ion<br>(m/z) | Product<br>Ion (m/z) | Fragmentor<br>Voltage (V) | Collision<br>Energy (eV) | Retention<br>time (min)<br>( |
|-------------------|---------------------|----------------------|---------------------------|--------------------------|------------------------------|
| Chlortetracycline | 479                 | 462                  | 110                       | 16                       | 12.92                        |
| Doxycycline*      | 445                 | 428                  | 120                       | 15                       | 13.02                        |
| Lincomycin        | 407                 | 126                  | 90                        | 30                       | 12.04                        |
| Neotame           | 379                 | 172                  | 150                       | 20                       | 14.63                        |
| Oleandomycin**    | 688.85              | 158.2                | 130                       | 25                       | 13.07                        |
| Penicillin G      | 335                 | 160                  | 70                        | 5                        | 13.21                        |
| Penicillin V*     | 351                 | 160                  | 70                        | 5                        | 13.58                        |
| Penillic acid     | 335                 | 176                  | 70                        | 10                       | 13.18                        |
| Roxithromycin*    | 837.5               | 158                  | 170                       | 35                       | 14.48                        |
| Tiamulin          | 494.7               | 191.9                | 70                        | 15                       | 13.68                        |

93 Table S5. Impact of manure application on the ARG (copy/mL) and antibiotic (µg/L) concentrations in runoff from plots with the 18.3 m setback  
 94 distance.

|                                   | 16S<br>rRNA         | <i>bla</i> <sub>TEM</sub> | <i>erm</i> (B)        | <i>erm</i> (C)      | <i>erm</i> (F)        | <i>intI1</i>          | <i>tet</i> (D)      | <i>tet</i> (O)      | <i>tet</i> (Q)        | <i>tet</i> (X)      | CTC <sup>c</sup> | LIN <sup>d</sup> | TIA <sup>e</sup> |
|-----------------------------------|---------------------|---------------------------|-----------------------|---------------------|-----------------------|-----------------------|---------------------|---------------------|-----------------------|---------------------|------------------|------------------|------------------|
| <b><i>Manure Application</i></b>  |                     |                           |                       |                     |                       |                       |                     |                     |                       |                     |                  |                  |                  |
| Amended plots<br>(with manure)    | 4.0×10 <sup>5</sup> | 2.8×10 <sup>3</sup>       | 7.6×10 <sup>4</sup> a | 3.7×10 <sup>3</sup> | 5.2×10 <sup>4</sup> a | 2.8×10 <sup>4</sup> a | 2.0×10 <sup>1</sup> | 4.5×10 <sup>2</sup> | 3.5×10 <sup>3</sup> a | 3.9×10 <sup>4</sup> | 1.48             | 1.11 a           | 0.015            |
| Control plots<br>(without manure) | 9.5×10 <sup>3</sup> | 4.4×10 <sup>2</sup>       | 6.9×10 <sup>1</sup> b | BDL <sup>a</sup>    | 4.0×10 <sup>2</sup> b | 7.4×10 <sup>1</sup> b | 3.0×10 <sup>1</sup> | BDL                 | 9.6×10 <sup>1</sup> b | 1.3×10 <sup>3</sup> | BDL              | 0.01 b           | BDL              |
| <b><i>p-values:</i></b>           | 0.113               | 0.172                     | 0.004                 | N/A <sup>b</sup>    | 0.029                 | 0.004                 | 0.526               | N/A                 | 0.009                 | 0.561               | N/A              | < 0.001          | N/A              |

95 <sup>a</sup>BDL, below detection limit, indicates that there were too few values above detection limit to estimate an average

96 <sup>b</sup>N/A, not applicable, indicates that there were too few values to successfully run ANOVA.

97 <sup>c</sup>CTC; chlortetracycline

98 <sup>d</sup>LIN; lincomycin

99 <sup>e</sup>TIA; tiamulin

100

101

102 Table S6. Impact of manure application on the ARG (copy/g dw) and antibiotic (ng/g dw) concentrations in soil.

|                                  | 16S<br>rRNA         | <i>bla</i> <sub>TEM</sub> | <i>erm</i> (B)      | <i>erm</i> (C)      | <i>erm</i> (F)      | <i>intI1</i>        | <i>tet</i> (D)      | <i>tet</i> (O)      | <i>tet</i> (Q)      | <i>tet</i> (X)      | CTC <sup>c</sup> | LIN <sup>d</sup> | TIA <sup>e</sup> |
|----------------------------------|---------------------|---------------------------|---------------------|---------------------|---------------------|---------------------|---------------------|---------------------|---------------------|---------------------|------------------|------------------|------------------|
| <b><i>Manure Application</i></b> |                     |                           |                     |                     |                     |                     |                     |                     |                     |                     |                  |                  |                  |
| Amended plot<br>(with manure)    | 5.8×10 <sup>7</sup> | 2.4×10 <sup>4</sup>       | 1.6×10 <sup>6</sup> | 1.3×10 <sup>6</sup> | 7.4×10 <sup>5</sup> | 2.9×10 <sup>6</sup> | 1.8×10 <sup>4</sup> | 3.5×10 <sup>4</sup> | 7.7×10 <sup>5</sup> | 1.2×10 <sup>6</sup> | 51.2             | 0.75             | 6.35             |
| Control plot<br>(without manure) | 1.1×10 <sup>8</sup> | 2.0×10 <sup>4</sup>       | BDL <sup>a</sup>    | BDL                 | BDL                 | 1.5×10 <sup>4</sup> | 1.6×10 <sup>4</sup> | BDL                 | BDL                 | BDL                 | 0.62             | BDL              | BDL              |
| <b><i>p-values:</i></b>          | 0.443               | 0.558                     | N/A <sup>b</sup>    | N/A                 | N/A                 | 0.003               | 0.466               | N/A                 | N/A                 | N/A                 | 0.017            | N/A              | N/A              |

103 <sup>a</sup>BDL, below detection limit, indicates that there were too few values above detection limit to estimate an average.

104 <sup>b</sup>N/A, not applicable, indicates that there were too few values for ANOVA to return a *p*-value.

105 <sup>c</sup>CTC; chlortetracycline

106 <sup>d</sup>LIN; lincomycin

107 <sup>e</sup>TIA; tiamulin



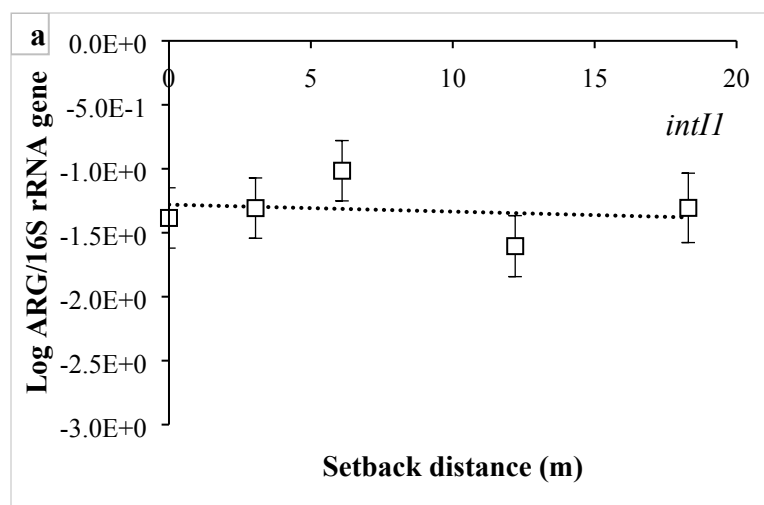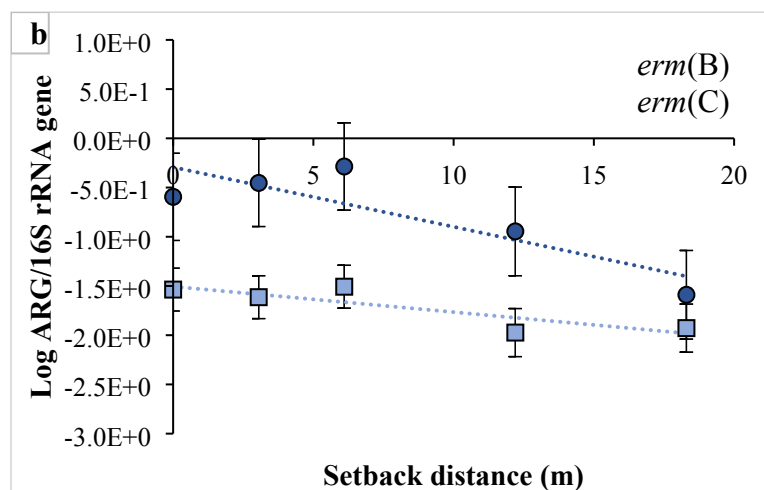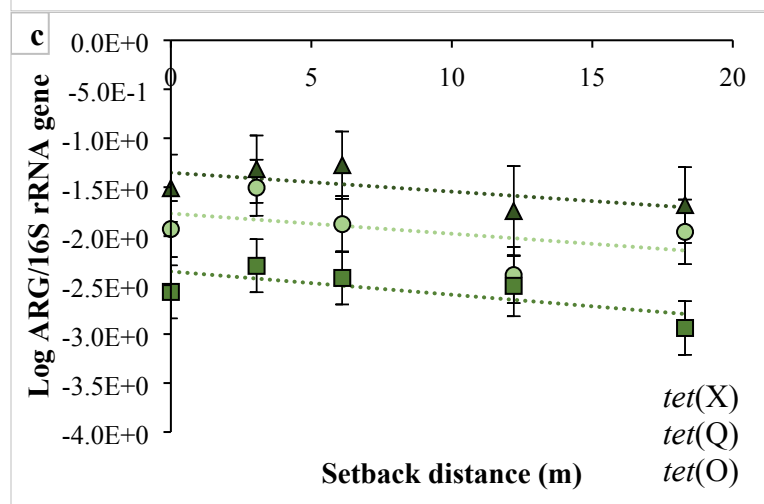

Figure S1. Means of log concentration of the relative abundance of (a) *intII*, (b) erythromycin resistance methylase (*erm*) genes, and (c) tetracycline resistance (*tet*) genes in runoff from manure-amended plots after the rainfall #1. The error bars represent the standard errors based on the ANOVA analysis with GLIMMIX. The trendlines are linear.

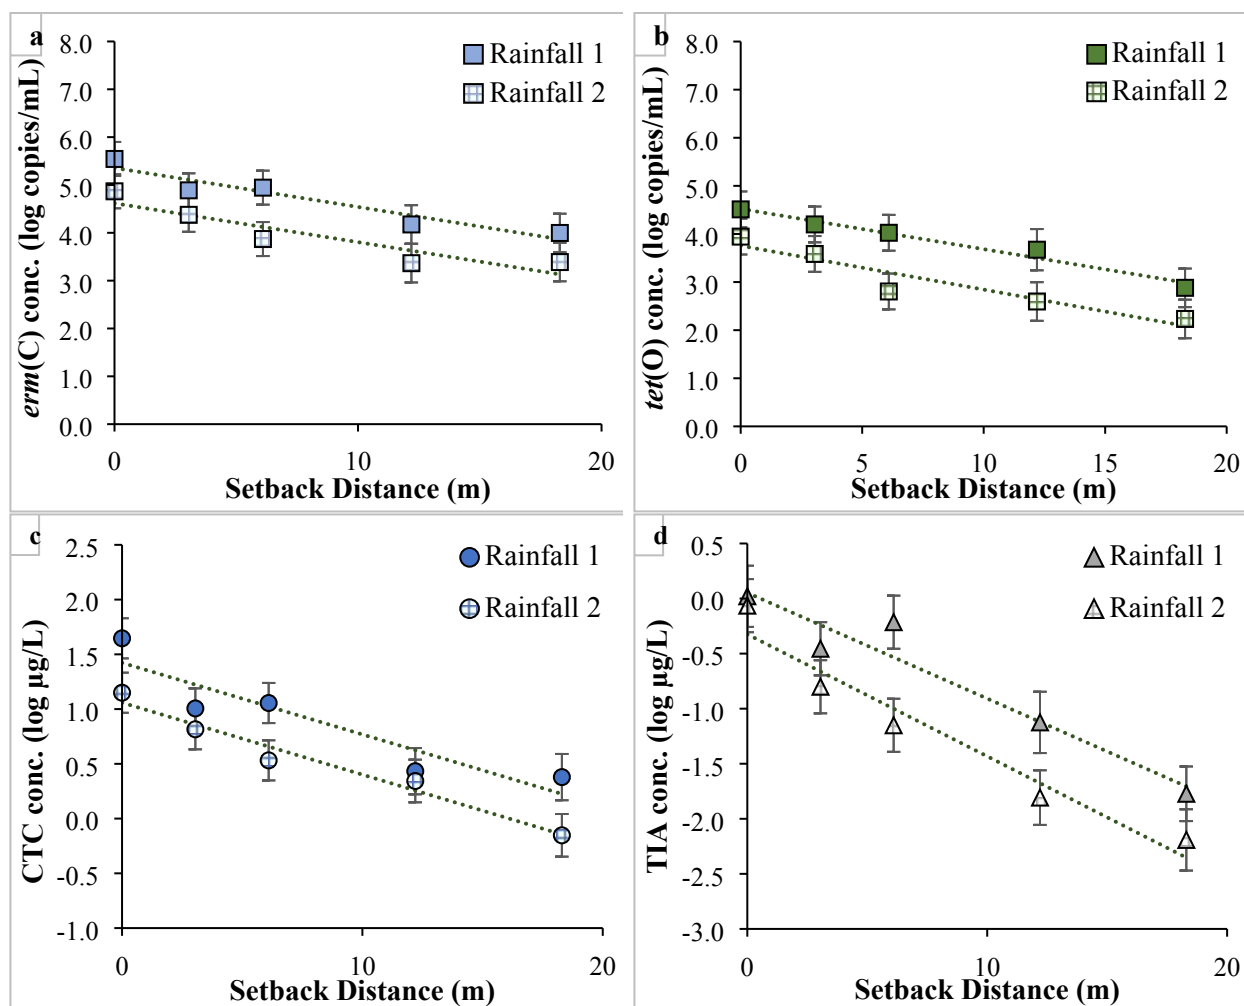

Figure S2. Weighted average concentration of (a) *erm(C)*, (b) *tet(O)*, (c) chlortetracycline (CTC), and (d) tiamulin (TIA) in runoff during rainfall #1 and rainfall #2. The error bars represent the standard errors based on the ANOVA analysis of replicates and distance using GLIMMIX.

## References

1. Suzuki, M. T.; Taylor, L. T.; DeLong, E. F., Quantitative analysis of small-subunit rRNA genes in mixed microbial populations via 5'-nuclease assays. *Appl. Environ. Microbiol.* **2000**, *66*, (11), 4605-4614.
2. Lachmayr, K. L.; Kerkhof, L. J.; DiRienzo, A. G.; Cavanaugh, C. M.; Ford, T. E., Quantifying Nonspecific TEM beta-Lactamase (bla(TEM)) Genes in a Wastewater Stream. *Appl. Environ. Microbiol.* **2009**, *75*, (1), 203-211.
3. Koike, S.; Aminov, R. I.; Yannarell, A. C.; Gans, H. D.; Krapac, I. G.; Chee-Sanford, J. C.; Mackie, R. I., Molecular ecology of Macrolide-Lincosamide-Streptogramin B methylases in waste lagoons and subsurface waters associated with swine production. *Microb. Ecol.* **2010**, *59*, (3), 487-498.
4. Rosewarne, C. P.; Pettigrove, V.; Stokes, H. W.; Parsons, Y. M., Class 1 integrons in benthic bacterial communities: abundance, association with Tn402-like transposition modules and evidence for coselection with heavy-metal resistance. *FEMS Microbiol Ecol* **2010**, *72*, (1), 35-46.
5. Fan, W.; Hamilton, T.; Webster-Sesay, S.; Nikolich, M. P.; Lindler, L. E., Multiplex real-time SYBR Green IPCR assay for detection of tetracycline efflux genes of Gram-negative bacteria. *Mol. Cell. Probes* **2007**, *21*, (4), 245-256.
6. Aminov, R. I.; Garrigues-Jeanjean, N.; Mackie, R. I., Molecular ecology of tetracycline resistance: Development and validation of primers for detection of tetracycline resistance genes encoding ribosomal protection proteins. *Appl. Environ. Microbiol.* **2001**, *67*, (1), 22-32.
7. Pei, R. T.; Kim, S. C.; Carlson, K. H.; Pruden, A., Effect of River Landscape on the sediment concentrations of antibiotics and corresponding antibiotic resistance genes (ARG). *Water Res.* **2006**, *40*, (12), 2427-2435.
8. Ghosh, S.; Ramsden, S. J.; LaPara, T. M., The role of anaerobic digestion in controlling the release of tetracycline resistance genes and class 1 integrons from municipal wastewater treatment plants. *Appl. Microbiol. Biotechnol.* **2009**, *84*, (4), 791-796.
9. Suzuki, M. T.; Giovannoni, S. J., Bias caused by template annealing in the amplification of mixtures of 16S rRNA genes by PCR. *Appl. Environ. Microbiol.* **1996**, *62*, (2), 625-630.
10. Ng, L. K.; Martin, I.; Alfa, M.; Mulvey, M., Multiplex PCR for the detection of tetracycline resistant genes. *Mol. Cell. Probes* **2001**, *15*, (4), 209-215.
